# Supplementary material
Source: HighWire-hosted journal article supplement (https://bmjopen.bmj.com/content/15/1/e085834)
Supplement: inline-supplementary-material-2 [file inline-supplementary-material-2.pdf]

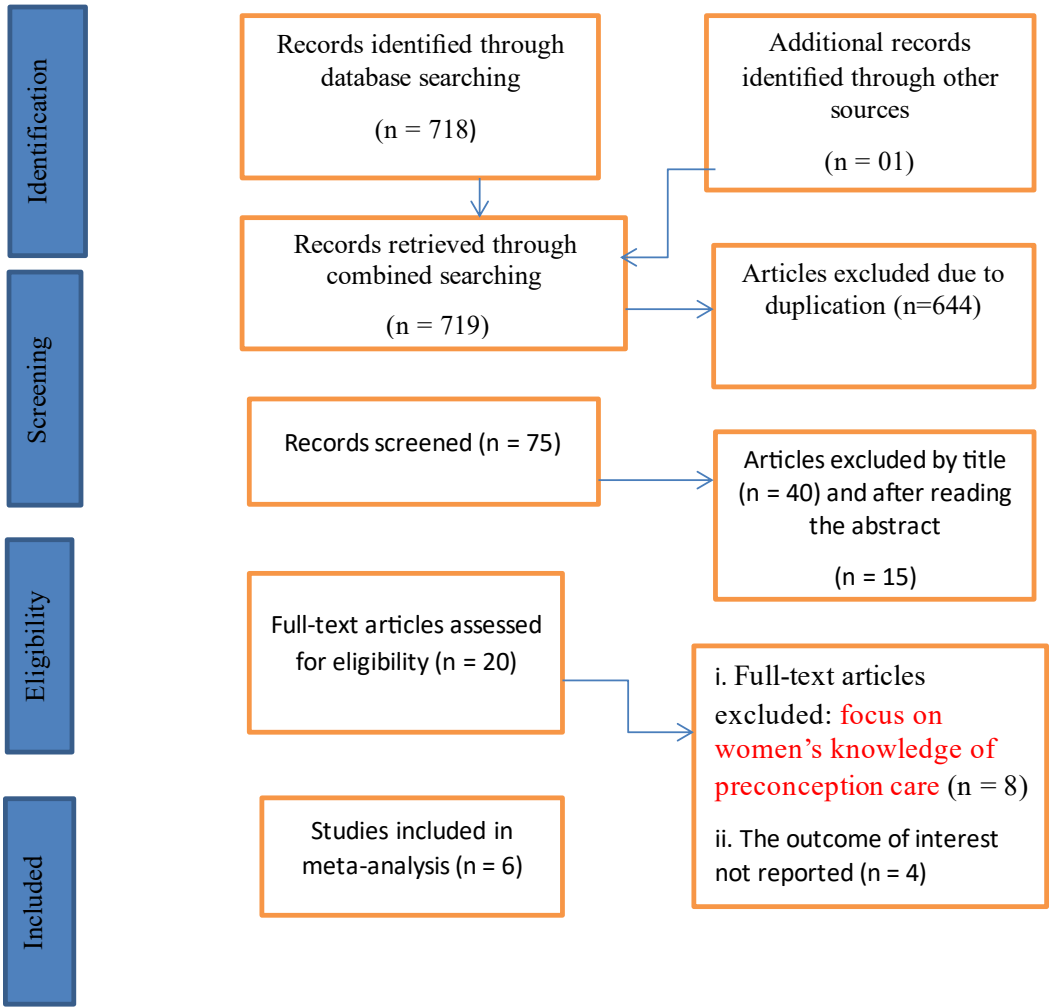

**Supplementary figure 1:**PRISMA Flow chart describing the selection of studies for the systematic review and meta-analysis of the level of knowledge of PCC and associated factors among healthcare providers in Ethiopia, 2024.

*Supplementary table 1: Summary of prevalence and odd ratio of observational studies included in the meta-analysis assessing health care providers level of knowledge of PCC in Ethiopia, 2024.*

| S.<br>N<br>o | Author                            | Preval<br>ence of<br>Knowl<br>edge | AO<br>R<br>ED<br>U | ED<br>UL | EDU<br>U | AOR<br>GU | GUL  | GU<br>U   | AOR<br>WO | WO<br>L | WO<br>U | AOR<br>TR | TRL  | TRU  |
|--------------|-----------------------------------|------------------------------------|--------------------|----------|----------|-----------|------|-----------|-----------|---------|---------|-----------|------|------|
| 1.           | Abayneh H.<br>etal (2022)         | 48.20<br>%                         | 3.1                | 1.5      | 6.1      | 1.85      | 1.09 | 3.12      | 2.12      | 1.1     | 3.8     | 3.5       | 1.9  | 6.4  |
| 2.           | Andargache<br>w K. etal<br>(2018) | 31%                                | 2.3                | 1.1      | 4.7      | 1.8       | 1.3  | 2.5       | 1.9       | 1.4     | 2.7     |           |      |      |
| 3.           | Bekele MM.<br>etal (2020)         | 52%                                |                    |          |          | 3:50      | 1.87 | 5.29      | 3.8       | 2.73    | 5.32    | 5.36      | 3.8  | 7.62 |
| 4.           | Seman WA.<br>etal (2019)          | 69.20<br>%                         |                    |          |          |           |      |           |           |         |         |           |      |      |
| 5.           | Sori SA. etal<br>(2021)           | 60.20<br>%                         | 6.9<br>7           | 3.85     | 12.6     | 5.95      | 3.18 | 11.1<br>1 | 3.99      | 2.59    | 6.15    | 2.9       | 1.37 | 6.15 |
| 6.           | Belay DT.<br>etal (2020)          | 49.10<br>%                         | 2.1                | 1.4      | 3.1      | 2         | 1.2  | 3.3       | 2.3       | 0.6     | 3.4     |           |      |      |

**Supplementary table 2:** Summary of the 6 observational studies included in the meta-analysis assessing health care providers level of knowledge of PCC in Ethiopia, 2024.

| Author                    | Publication Year | Prevalence of Knowledge | Region      | Study Area          | Design          | Sample size |
|---------------------------|------------------|-------------------------|-------------|---------------------|-----------------|-------------|
| Abayneh H. etal (2022)    | 2022             | 48.20%                  | Oromia      | West Shoa           | cross-sectional | 362         |
| Andargachew K.etal (2018) | 2018             | 31%                     | SNNP        | Hawassa             | cross-sectional | 634         |
| Bekele MM. etal (2020)    | 2020             | 52%                     | Amhara      | Awi zone            | cross-sectional | 660         |
| Seman WA. etal (2019)     | 2019             | 69.20%                  | Addis Ababa | Tikur Anbesa        | cross-sectional | 156         |
| Sori SA. etal (2021)      | 2021             | 60.20%                  | Oromia      | Harar and Dire Dawa | cross-sectional | 410         |
| Belay DT. etal (2020)     | 2020             | 49.10%                  | Amhara      | North Wollo         | cross-sectional | 536         |

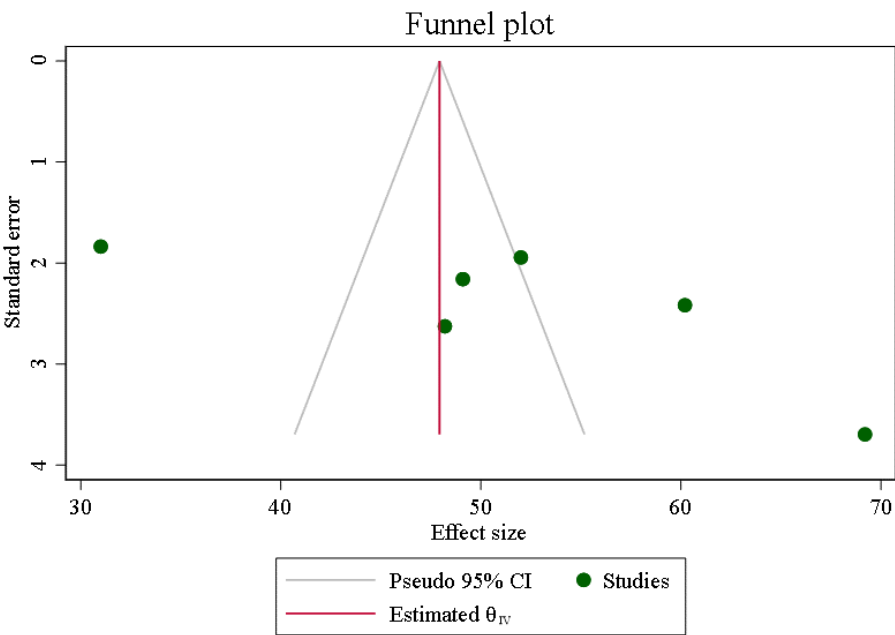

**Supplementary figure 2:** Publication bias for the pooled estimate of prevalence of health care provider’s knowledge on preconception care in Ethiopia, 2024.

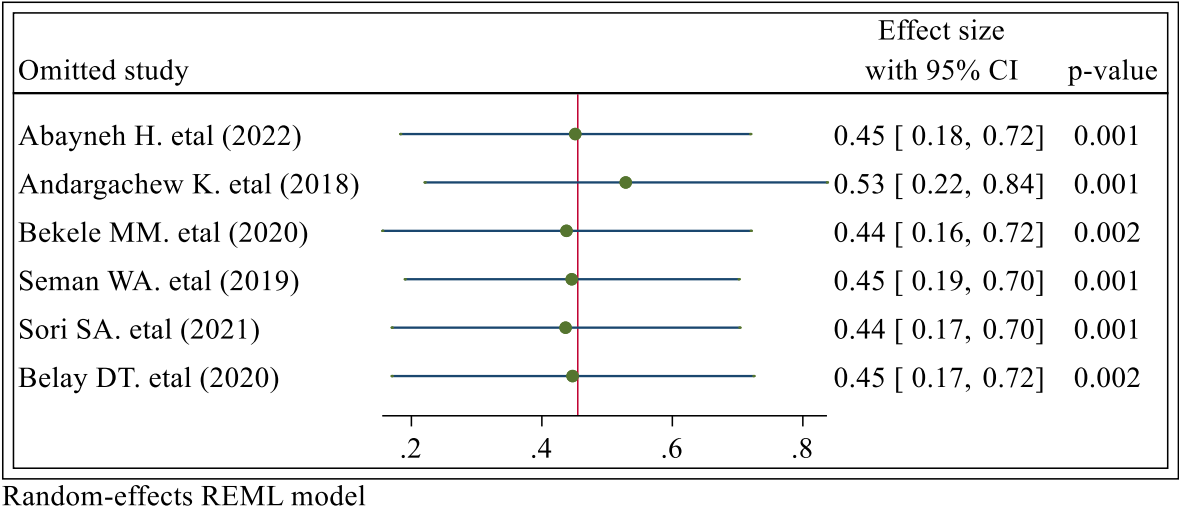

**Supplementary figure 3:** Sensitivity analysis of knowledge of preconception care among healthcare providers in Ethiopia 2024.
